# Supplementary material for: Animal Research in Spain: A Study of Public Perception and Attitudes
Source: MDPI journal article supplement (doi:10.3390/ani13122039), 2023-06-20
Supplement: s1 [file s1]

## Supplementary material

---

### Survey

#### Demographic data

1. Age (years)

18-24

25-29

30-39

40-65

> 65

2. Gender

Women

Men

I do not identify with either of the above

3. Place of residence

4. Education level

Primary education incomplete

Primary school

Secondary school

High school

Non-further education (including vocational training)

University first stage

Graduate University studies (Master's, Doctorate)

a. If you are a non-university level, university first stage, Masters or PhD student in the field of Science, indicate the degree programme.

b. If you work in Science, briefly indicate where and what you do.

Public opinion data

5. Do you approve of using animals for research purposes?

Yes

No

6. How much animal research do you think is done (from 0 to 10, where 0=none and 10=a lot)?

7. How much do you think you know about animal research e.g., protocols, legislation, etc) (from 0-10, where 0=none and 10=a lot)?

8. Do you think that animal research is subject to strict regulation? Yes/No

9. Do you know the principle of the 3Rs by Russell and Burch? Yes/No
10. How necessary do you think animal experimentation is for biomedical research (from 0-10, where 0= not at all and 10= very)?
11. How much do you agree with using animals to find a cure for human diseases (from 0-10, where 0= not at all and 10= very much)?
12. If you have or had a sick pet that needed medication, would you agree that this medication should be tested on the same species as your pet for a drug agency to approve it? Yes/No
13. How much do you agree with using animals to test non-medicinal products (from 0-10, where 0=not at all and 10= very much).

Experimental animal data

14. Which animals do you think are the most used in research? \* Select two options\*

Dog

Mouse

Cat

Rat

Non-human primate

Other (add option)

15. Which animal would you choose for biomedical research? \* Select two options \*

*Drosophila melanogaster* (fruit fly)

Mouse

Zebra-fish

Non-human primates

Dog

Indifferent

16. Do you think there are alternative methods to animal models for research? Yes/No

16a. If you think there are alternative methods to animal models for research, indicate the ones you know about:

In vitro cell lines

Invertebrate animal models

Tissue models: chips

*In silico* analysis (computer simulations)

17. Do you think these alternative methods should be used more than animal models?

Yes/No

18. Do you think it should be mandatory for all products to state whether animal testing was necessary for their preparation? Yes/No

18.a If you answered yes, would you stop using a product that previously did not provide that information but now states it was tested in animals? Yes/No

19. Do you think that animal research has been or is still necessary to find a cure for COVID-19 (e.g., vaccine, treatment)? Yes/No
20. Do you think that scientists should conduct animal testing only in certain situations such as the SARS-Cov-2 emergency, and not for other diseases? Yes/No
21. Has this survey made you think about animal research? Yes/No

Table S1. Univariate and multivariate regression model of questions 5 to 13 and 16 to 21.

| Question 5. Do you approve of using animals for research purposes? |                   |                   |     |            |       |        |         |              |       |        |         |  |  |
|--------------------------------------------------------------------|-------------------|-------------------|-----|------------|-------|--------|---------|--------------|-------|--------|---------|--|--|
|                                                                    |                   |                   |     |            |       |        |         |              |       |        |         |  |  |
| Variable                                                           |                   | Participation (n) |     | Univariate |       |        |         | Multivariate |       |        |         |  |  |
|                                                                    |                   | Yes               | No  | OR         | 95%CI |        | p-Value | OR           | 95%CI |        | p-Value |  |  |
| <b>Age</b>                                                         |                   |                   |     |            |       |        |         |              |       |        |         |  |  |
|                                                                    | >24               | 259               | 77  |            | 1.00  |        |         |              | -     |        |         |  |  |
|                                                                    | 18-24             | 330               | 140 | 1.43       | 1.03  | - 1.97 | 0.031   |              | -     |        |         |  |  |
| <b>Gender</b>                                                      |                   |                   |     |            |       |        |         |              |       |        |         |  |  |
|                                                                    | Men               | 225               | 58  |            | 1.00  |        |         |              | 1.00  |        |         |  |  |
|                                                                    | Women             | 362               | 156 | 1.67       | 1.18  | - 2.36 | 0.003   | 1.77         | 1.24  | - 2.53 | 0.002   |  |  |
| <b>Living area</b>                                                 |                   |                   |     |            |       |        |         |              |       |        |         |  |  |
|                                                                    | Urban             | 555               | 201 |            | 1.00  |        |         |              | -     |        |         |  |  |
|                                                                    | Rural             | 22                | 12  | 1.51       | 0.73  | - 3.10 | 0.266   |              | -     |        |         |  |  |
| <b>Scientific background</b>                                       |                   |                   |     |            |       |        |         |              |       |        |         |  |  |
|                                                                    | Yes               | 304               | 71  |            | 1.00  |        |         |              | 1.00  |        |         |  |  |
|                                                                    | No                | 285               | 146 | 2.19       | 1.58  | - 3.04 | <0.001  | 2.47         | 1.76  | - 3.47 | <0.001  |  |  |
| <b>Autonomous Community</b>                                        |                   |                   |     |            |       |        |         |              |       |        |         |  |  |
|                                                                    | Other communities | 189               | 65  |            | 1.00  |        |         |              | -     |        |         |  |  |
|                                                                    | Madrid            | 381               | 146 | 1.11       | 0.79  | - 1.57 | 0.533   |              | -     |        |         |  |  |
| <b>Education level university</b>                                  |                   |                   |     |            |       |        |         |              |       |        |         |  |  |
|                                                                    | Yes               | 447               | 142 |            | 1.00  |        |         |              | -     |        |         |  |  |
|                                                                    | No                | 142               | 75  | 1.66       | 1.19  | - 2.33 | 0.003   |              | -     |        |         |  |  |
| <b>Media incident</b>                                              |                   |                   |     |            |       |        |         |              |       |        |         |  |  |
|                                                                    | Before            | 499               | 153 |            | 1.00  |        |         |              | 1.00  |        |         |  |  |
|                                                                    | After             | 90                | 64  | 2.32       | 1.60  | - 3.35 | <0.001  | 2.41         | 1.64  | - 3.54 | <0.001  |  |  |

Question 6. How much animal research do you think is done (0=none to 10=a lot)?

| Variable      |       | Participation (n) |                  | Univariate |       |        |         | Multivariate |       |  |         |  |  |
|---------------|-------|-------------------|------------------|------------|-------|--------|---------|--------------|-------|--|---------|--|--|
|               |       | < median (< 8.0)  | ≥ median (≥ 8.0) | OR         | 95%CI |        | p-Value | OR           | 95%CI |  | p-Value |  |  |
| <b>Age</b>    |       |                   |                  |            |       |        |         |              |       |  |         |  |  |
|               | >24   | 126               | 210              |            | 1.00  |        |         |              | -     |  |         |  |  |
|               | 18-24 | 176               | 294              | 1.00       | 0.75  | - 1.34 | 0.988   |              | -     |  |         |  |  |
| <b>Gender</b> |       |                   |                  |            |       |        |         |              |       |  |         |  |  |
|               | Men   | 119               | 164              |            | 1.00  |        |         |              | 1.00  |  |         |  |  |

|                                   |                   |     |     |      |      |   |      |       |      |      |   |      |       |
|-----------------------------------|-------------------|-----|-----|------|------|---|------|-------|------|------|---|------|-------|
|                                   | Women             | 181 | 337 | 1.35 | 1.00 | - | 1.82 | 0.047 | 1.35 | 1.00 | - | 1.82 | 0.047 |
| <b>Living area</b>                |                   |     |     |      |      |   |      |       |      |      |   |      |       |
|                                   | Rural             | 15  | 19  |      |      |   | 1.00 |       |      |      |   | -    |       |
|                                   | Urban             | 277 | 479 | 1.37 | 0.68 | - | 2.73 | 0.379 |      |      |   | -    |       |
| <b>Scientific background</b>      |                   |     |     |      |      |   |      |       |      |      |   |      |       |
|                                   | No                | 164 | 267 |      |      |   | 1.00 |       |      |      |   | -    |       |
|                                   | Yes               | 138 | 237 | 1.05 | 0.79 | - | 1.40 | 0.710 |      |      |   | -    |       |
| <b>Autonomous Community</b>       |                   |     |     |      |      |   |      |       |      |      |   |      |       |
|                                   | Other communities | 100 | 154 |      |      |   | 1.00 |       |      |      |   | -    |       |
|                                   | Madrid            | 194 | 333 | 1.11 | 0.82 | - | 1.52 | 0.490 |      |      |   | -    |       |
| <b>Education level university</b> |                   |     |     |      |      |   |      |       |      |      |   |      |       |
|                                   | Yes               | 226 | 363 |      |      |   | 1.00 |       |      |      |   | -    |       |
|                                   | No                | 76  | 141 | 1.16 | 0.83 | - | 1.60 | 0.384 |      |      |   | -    |       |
| <b>Media incident</b>             |                   |     |     |      |      |   |      |       |      |      |   |      |       |
|                                   | After             | 58  | 96  |      |      |   | 1.00 |       |      |      |   | -    |       |
|                                   | Before            | 244 | 408 | 1.01 | 0.70 | - | 1.45 | 0.956 |      |      |   | -    |       |

Question 7. How much do you think you know about animal research (e.g., protocols, legislation etc.)? (0=nothing to 10=a lot).

| Variable              |                   | Participation (n)   |                     | Univariate |       |   |      |         | Multivariate |       |      |      |         |  |  |
|-----------------------|-------------------|---------------------|---------------------|------------|-------|---|------|---------|--------------|-------|------|------|---------|--|--|
|                       |                   | ≤ median<br>(≤ 3.0) | > median<br>(> 3.0) | OR         | 95%CI |   |      | p-Value | OR           | 95%CI |      |      | p-Value |  |  |
| Age                   |                   |                     |                     |            |       |   |      |         |              |       |      |      |         |  |  |
|                       | 18-24             | 274                 | 196                 |            | 1.00  |   |      |         |              |       | -    |      |         |  |  |
|                       | >24               | 191                 | 145                 | 1.06       | 0.80  | - | 1.41 | 0.680   |              |       | -    |      |         |  |  |
| Gender                |                   |                     |                     |            |       |   |      |         |              |       |      |      |         |  |  |
|                       | Women             | 309                 | 209                 |            | 1.00  |   |      |         |              |       | -    |      |         |  |  |
|                       | Men               | 155                 | 128                 | 1.22       | 0.91  | - | 1.64 | 0.180   |              |       | -    |      |         |  |  |
| Living area           |                   |                     |                     |            |       |   |      |         |              |       |      |      |         |  |  |
|                       | Rural             | 20                  | 14                  |            | 1.00  |   |      |         |              |       | -    |      |         |  |  |
|                       | Urban             | 435                 | 321                 | 1.05       | 0.52  | - | 2.12 | 0.882   |              |       | -    |      |         |  |  |
| Scientific background |                   |                     |                     |            |       |   |      |         |              |       |      |      |         |  |  |
|                       | No                | 302                 | 129                 |            | 1.00  |   |      |         |              |       | 1.00 |      |         |  |  |
|                       | Yes               | 163                 | 212                 | 3.04       | 2.28  | - | 4.07 | <0.001  | 3.12         | 2.33  | -    | 4.18 | <0.001  |  |  |
| Autonomous Community  |                   |                     |                     |            |       |   |      |         |              |       |      |      |         |  |  |
|                       | Other communities | 148                 | 106                 |            | 1.00  |   |      |         |              |       | -    |      |         |  |  |
|                       | Madrid            | 300                 | 227                 | 1.06       | 0.78  | - | 1.43 | 0.722   |              |       | -    |      |         |  |  |

|                            |        |     |     |      |      |   |      |       |      |      |   |      |
|----------------------------|--------|-----|-----|------|------|---|------|-------|------|------|---|------|
| Education level university | No     | 145 | 72  | 1.00 |      |   |      |       |      |      |   | -    |
|                            | Yes    | 320 | 269 | 1.69 | 1.22 | - | 2.34 | 0.002 | -    |      |   |      |
| Media incident             | After  | 99  | 55  | 1.00 |      |   |      |       |      |      |   | 1.00 |
|                            | Before | 366 | 286 | 1.41 | 0.98 | - | 2.02 | 0.066 | 1.55 | 1.06 | - | 2.27 |

**Question 8. Do you think that animal research is subject to strict regulation?**

| Variable                   |                   | Participation (n) |     | Univariate |       |   |         | Multivariate |       |      |         |      |        |
|----------------------------|-------------------|-------------------|-----|------------|-------|---|---------|--------------|-------|------|---------|------|--------|
|                            |                   | No                | Yes | OR         | 95%CI |   | p-Value | OR           | 95%CI |      | p-Value |      |        |
| Age                        |                   |                   |     |            |       |   |         |              |       |      |         |      |        |
|                            | 18-24             | 177               | 293 |            | 1.00  |   |         |              |       | -    |         |      |        |
|                            | >24               | 110               | 226 | 1.24       | 1.67  | - | 0.92    | 0.150        |       | -    |         |      |        |
| Gender                     |                   |                   |     |            |       |   |         |              |       |      |         |      |        |
|                            | Women             | 189               | 329 |            | 1.00  |   |         |              |       | -    |         |      |        |
|                            | Men               | 96                | 187 | 1.12       | 1.52  | - | 0.83    | 0.47         |       | -    |         |      |        |
| Living area                |                   |                   |     |            |       |   |         |              |       |      |         |      |        |
|                            | Urban             | 270               | 486 |            | 1.00  |   |         |              |       | -    |         |      |        |
|                            | Rural             | 11                | 23  | 1.16       | 0.56  | - | 2.42    | 0.689        |       | -    |         |      |        |
| Scientific background      |                   |                   |     |            |       |   |         |              |       |      |         |      |        |
|                            | No                | 209               | 222 |            | 1.00  |   |         |              |       | 1.00 |         |      |        |
|                            | Yes               | 78                | 297 | 3.58       | 2.62  | - | 4.90    | <0.001       | 2.95  | 2.08 | -       | 4.20 | <0.001 |
| Autonomous Community       |                   |                   |     |            |       |   |         |              |       |      |         |      |        |
|                            | Madrid            | 195               | 332 |            | 1.00  |   |         |              |       | -    |         |      |        |
|                            | Other communities | 79                | 175 | 1.30       | 1.79  | - | 0.95    | 0.106        |       | -    |         |      |        |
| Education level university |                   |                   |     |            |       |   |         |              |       |      |         |      |        |
|                            | No                | 122               | 95  |            | 1.00  |   |         |              |       | 1.00 |         |      |        |
|                            | Yes               | 165               | 424 | 3.30       | 2.39  | - | 4.56    | <0.001       | 2.04  | 1.42 | -       | 2.93 | <0.001 |
| Media incident             |                   |                   |     |            |       |   |         |              |       |      |         |      |        |
|                            | After             | 78                | 76  |            | 1.00  |   |         |              |       | 1.00 |         |      |        |
|                            | Before            | 209               | 443 | 1.25       | 1.52  | - | 3.11    | 0.264        | 2.50  | 1.70 | -       | 3.67 | <0.001 |

**Question 9. Do you know the principle of the 3Rs by Russel and Burch?**

| Variable   | Participation (n) |     | Univariate |       |  |         | Multivariate |       |  |         |
|------------|-------------------|-----|------------|-------|--|---------|--------------|-------|--|---------|
|            | No                | Yes | OR         | 95%CI |  | p-Value | OR           | 95%CI |  | p-Value |
| <b>Age</b> |                   |     |            |       |  |         |              |       |  |         |



|                                   |                   |     |     |      |      |   |       |        |      |      |      |              |
|-----------------------------------|-------------------|-----|-----|------|------|---|-------|--------|------|------|------|--------------|
|                                   | >24               | 243 | 93  |      |      |   | 1.00  |        |      |      | -    |              |
|                                   | 18-24             | 286 | 184 | 1.68 | 1.24 | - | 2.27  | 0.001  |      |      | -    |              |
| <b>Gender</b>                     |                   |     |     |      |      |   |       |        |      |      |      |              |
|                                   | Men               | 190 | 93  |      |      |   | 1.00  |        |      |      | -    |              |
|                                   | Women             | 337 | 181 | 1.10 | 0.81 | - | 1.49  | 0.553  |      |      | -    |              |
| <b>Living area</b>                |                   |     |     |      |      |   |       |        |      |      |      |              |
|                                   | Rural             | 26  | 8   |      |      |   | 1.00  |        |      |      | -    |              |
|                                   | Urban             | 489 | 267 | 1.77 | 0.79 | - | 3.97  | 0.160  |      |      | -    |              |
| <b>Scientific background</b>      |                   |     |     |      |      |   |       |        |      |      |      |              |
|                                   | No                | 375 | 56  |      |      |   | 1.00  |        |      |      | 1.00 |              |
|                                   | Yes               | 154 | 221 | 9.61 | 6.78 | - | 13.61 | <0.001 | 9.43 | 6.65 | -    | 13.36 <0.001 |
| <b>Autonomous Community</b>       |                   |     |     |      |      |   |       |        |      |      |      |              |
|                                   | Madrid            | 342 | 185 |      |      |   | 1.00  |        |      |      | -    |              |
|                                   | Other communities | 163 | 91  | 1.03 | 0.75 | - | 1.41  | 0.843  |      |      | -    |              |
| <b>Education level university</b> |                   |     |     |      |      |   |       |        |      |      |      |              |
|                                   | No                | 185 | 32  |      |      |   | 1.00  |        |      |      | -    |              |
|                                   | Yes               | 344 | 245 | 4.12 | 2.73 | - | 6.20  | <0.001 |      |      | -    |              |
| <b>Media incident</b>             |                   |     |     |      |      |   |       |        |      |      |      |              |
|                                   | After             | 103 | 51  |      |      |   | 1.00  |        |      |      | -    |              |
|                                   | Before            | 426 | 226 | 2.17 | 0.74 | - | 1.55  | <0.001 |      |      | -    |              |

Question 10. How necessary do you think animal experimentation is for biomedical research ( 0= not at all to 10= very)?

| Variable              |       | Participation (n) |                  | Univariate |       |        |         | Multivariate |       |        |         |        |  |
|-----------------------|-------|-------------------|------------------|------------|-------|--------|---------|--------------|-------|--------|---------|--------|--|
|                       |       | < median (< 8.0)  | ≥ median (≥ 8.0) | OR         | 95%CI |        | p-Value | OR           | 95%CI |        | p-Value |        |  |
| Age                   |       |                   |                  |            |       |        |         |              |       |        |         |        |  |
|                       | 18-24 | 215               | 255              |            | 1.00  |        |         |              | 1.00  |        |         |        |  |
|                       | >24   | 126               | 210              | 1.41       | 1.06  | - 1.87 | 0.020   | 1.43         | 1.04  | - 1.96 |         | 0.028  |  |
| Gender                |       |                   |                  |            |       |        |         |              |       |        |         |        |  |
|                       | Women | 233               | 285              |            | 1.00  |        |         |              | 1.00  |        |         |        |  |
|                       | Men   | 105               | 178              | 1.39       | 1.03  | - 1.86 | 0.030   | 1.45         | 1.07  | - 1.97 |         | 0.018  |  |
| Living area           |       |                   |                  |            |       |        |         |              |       |        |         |        |  |
|                       | Rural | 15                | 19               |            | 1.00  |        |         |              | -     |        |         |        |  |
|                       | Urban | 315               | 441              | 1.11       | 0.55  | - 2.21 | 0.777   |              | -     |        |         |        |  |
| Scientific background |       |                   |                  |            |       |        |         |              |       |        |         |        |  |
|                       | No    | 211               | 220              |            | 1.00  |        |         |              | 1.00  |        |         |        |  |
|                       | Yes   | 130               | 245              | 1.81       | 1.36  | - 2.40 | <0.001  | 2.07         | 1.53  | - 2.79 |         | <0.001 |  |

|                            |                   |     |     |      |      |   |      |       |      |      |   |      |       |
|----------------------------|-------------------|-----|-----|------|------|---|------|-------|------|------|---|------|-------|
| Autonomous Community       | Madrid            | 223 | 304 | 1.00 |      |   |      |       |      |      |   | -    |       |
|                            | Other communities | 103 | 151 | 1.08 | 0.79 | - | 1.46 | 0.640 |      |      |   |      | -     |
| Education level university | No                | 106 | 111 | 1.00 |      |   |      |       |      |      |   | -    |       |
|                            | Yes               | 235 | 354 | 1.44 | 1.05 | - | 1.97 | 0.020 |      |      |   |      | -     |
| Media incident             | After             | 84  | 70  | 1.00 |      |   |      |       |      |      |   | 1.00 |       |
|                            | Before            | 257 | 395 | 1.84 | 1.17 | - | 2.06 | 0.001 | 1.64 | 1.12 | - | 2.40 | 0.012 |

Question 11. How much do you agree with using animals to find a cure for human diseases (0= not at all to 10= very much)?

| Variable                   |                   | Participation (n) |                  | Univariate |       |   |      | Multivariate |      |       |   |      |         |
|----------------------------|-------------------|-------------------|------------------|------------|-------|---|------|--------------|------|-------|---|------|---------|
|                            |                   | ≤ median (≤8.0)   | > median (> 8.0) | OR         | 95%CI |   |      | p-Value      | OR   | 95%CI |   |      | p-Value |
| Age                        |                   |                   |                  |            |       |   |      |              |      |       |   |      |         |
|                            | 18-24             | 290               | 180              |            | 1.00  |   |      |              |      | 1.00  |   |      |         |
|                            | >24               | 171               | 165              | 1.55       | 1.12  | - | 2.00 | <0.001       | 1.48 | 1.09  | - | 2.02 | 0.013   |
| Gender                     |                   |                   |                  |            |       |   |      |              |      |       |   |      |         |
|                            | Women             | 313               | 205              |            | 1.00  |   |      |              |      | 1.00  |   |      |         |
|                            | Men               | 143               | 140              | 1.49       | 1.04  | - | 2.65 | 0.010        | 1.53 | 1.13  | - | 2.02 | 0.006   |
| Living area                |                   |                   |                  |            |       |   |      |              |      |       |   |      |         |
|                            | Urban             | 434               | 322              |            | 1.00  |   |      |              |      | -     |   |      |         |
|                            | Rural             | 18                | 16               | 1.20       | 0.60  | - | 2.39 | 0.610        |      |       | - |      |         |
| Scientific background      |                   |                   |                  |            |       |   |      |              |      |       |   |      |         |
|                            | No                | 265               | 166              |            | 1.00  |   |      |              |      | 1.00  |   |      |         |
|                            | Yes               | 196               | 179              | 1.46       | 1.10  | - | 1.93 | 0.010        | 1.73 | 1.28  | - | 2.32 | <0.001  |
| Autonomous Community       |                   |                   |                  |            |       |   |      |              |      |       |   |      |         |
|                            | Other communities | 147               | 107              |            | 1.00  |   |      |              |      | -     |   |      |         |
|                            | Madrid            | 302               | 225              | 1.02       | 0.76  | - | 1.39 | 0.880        |      |       | - |      |         |
| Education level university |                   |                   |                  |            |       |   |      |              |      |       |   |      |         |
|                            | No                | 134               | 83               |            | 1.00  |   |      |              |      | -     |   |      |         |
|                            | Yes               | 327               | 262              | 1.29       | 0.94  | - | 1.78 | 0.110        |      |       | - |      |         |
| Media incident             |                   |                   |                  |            |       |   |      |              |      |       |   |      |         |
|                            | After             | 109               | 45               |            | 1.00  |   |      |              |      | 1.00  |   |      |         |
|                            | Before            | 352               | 300              | 2.06       | 1.41  | - | 3.02 | <0.001       | 1.79 | 1.2   | - | 2.68 | 0.005   |

**Question 12. If you have or had a sick pet that needed medication, would you agree that this medication should be tested on the same species as your pet for a drug agency to approve it?**

| Variable                   |                   | Participation (n) |     | Univariate |       |   |      |         | Multivariate |       |   |      |         |
|----------------------------|-------------------|-------------------|-----|------------|-------|---|------|---------|--------------|-------|---|------|---------|
|                            |                   | No                | Yes | OR         | 95%CI |   |      | p-Value | OR           | 95%CI |   |      | p-Value |
| Age                        |                   |                   |     |            |       |   |      |         |              |       |   |      |         |
|                            | 18-24             | 85                | 385 |            | 1.00  |   |      |         |              | -     |   |      |         |
|                            | >24               | 42                | 294 | 1.55       | 1.04  | - | 2.30 | 0.030   |              |       | - |      |         |
| Gender                     |                   |                   |     |            |       |   |      |         |              |       |   |      |         |
|                            | Women             | 88                | 430 |            | 1.00  |   |      |         |              | -     |   |      |         |
|                            | Men               | 39                | 244 | 1.28       | 0.85  | - | 1.93 | 0.240   |              |       | - |      |         |
| Living area                |                   |                   |     |            |       |   |      |         |              |       |   |      |         |
|                            | Rural             | 6                 | 28  |            | 1.00  |   |      |         |              | -     |   |      |         |
|                            | Urban             | 120               | 636 | 1.14       | 0.46  | - | 2.80 | 0.782   |              |       | - |      |         |
| Scientific background      |                   |                   |     |            |       |   |      |         |              |       |   |      |         |
|                            | No                | 88                | 343 |            | 1.00  |   |      |         |              | 1.00  |   |      |         |
|                            | Yes               | 39                | 336 | 2.21       | 1.47  | - | 3.32 | <0.001  | 1.88         | 1.19  | - | 2.96 | 0.007   |
| Autonomous Community       |                   |                   |     |            |       |   |      |         |              |       |   |      |         |
|                            | Madrid            | 100               | 427 |            | 1.00  |   |      |         |              | 1.00  |   |      |         |
|                            | Other communities | 25                | 229 | 2.15       | 1.35  | - | 3.42 | 0.001   | 1.96         | 1.22  | - | 3.17 | 0.006   |
| Education level university |                   |                   |     |            |       |   |      |         |              |       |   |      |         |
|                            | No                | 51                | 166 |            | 1.00  |   |      |         |              | 1.00  |   |      |         |
|                            | Yes               | 76                | 513 | 2.07       | 1.40  | - | 3.08 | <0.001  | 1.60         | 1.02  | - | 2.50 | 0.042   |
| Media incident             |                   |                   |     |            |       |   |      |         |              |       |   |      |         |
|                            | After             | 38                | 116 |            | 1.00  |   |      |         |              | 1.00  |   |      |         |
|                            | Before            | 89                | 563 | 2.07       | 1.35  | - | 3.18 | 0.001   | 2.03         | 1.30  | - | 3.18 | 0.002   |

**Question 13. How much do you agree with using animals to test non-medicinal products (0=not at all to 10= very much)?**

| Variable    |       | Participation (n) |                  | Univariate |       |        |         | Multivariate |       |        |         |  |  |
|-------------|-------|-------------------|------------------|------------|-------|--------|---------|--------------|-------|--------|---------|--|--|
|             |       | ≤ median (≤2.0)   | > median (> 2.0) | OR         | 95%CI |        | p-Value | OR           | 95%CI |        | p-Value |  |  |
| Age         |       |                   |                  |            |       |        |         |              |       |        |         |  |  |
|             | 18-24 | 262               | 208              |            | 1.00  |        |         |              | -     |        |         |  |  |
|             | >24   | 174               | 162              | 1.17       | 0.89  | - 1.55 | 0.270   |              | -     |        |         |  |  |
| Gender      |       |                   |                  |            |       |        |         |              |       |        |         |  |  |
|             | Women | 301               | 217              |            | 1.00  |        |         |              | 1.00  |        |         |  |  |
|             | Men   | 130               | 153              | 1.63       | 1.22  | - 2.19 | <0.001  | 1.63         | 1.22  | - 2.19 | 0.001   |  |  |
| Living area |       |                   |                  |            |       |        |         |              |       |        |         |  |  |
|             | Rural | 19                | 15               |            | 1.00  |        |         |              | -     |        |         |  |  |
|             | Urban | 410               | 346              | 1.07       | 0.54  | - 2.14 | 0.850   |              | -     |        |         |  |  |

|                                   |                   |     |     |      |      |   |      |       |   |
|-----------------------------------|-------------------|-----|-----|------|------|---|------|-------|---|
| <b>Scientific background</b>      | Yes               | 205 | 170 |      |      |   | 1.00 |       | - |
|                                   | No                | 231 | 200 | 1.04 | 0.79 | - | 1.38 | 0.761 | - |
| <b>Autonomous Community</b>       | Madrid            | 288 | 239 |      |      |   | 1.00 |       | - |
|                                   | Other communities | 138 | 116 | 1.01 | 0.75 | - | 1.37 | 0.933 | - |
| <b>Education level university</b> | Yes               | 327 | 262 |      |      |   | 1.00 |       | - |
|                                   | No                | 109 | 108 | 1.24 | 0.91 | - | 1.69 | 0.182 | - |
| <b>Media incident</b>             | After             | 94  | 60  |      |      |   | 1.00 |       | - |
|                                   | Before            | 342 | 310 | 1.42 | 0.99 | - | 2.03 | 0.055 | - |

Question 16. Do you think there are alternative methods to animal models for research?

| Variable                   |                   | Participation (n) |     | Univariate |       |   |      |         | Multivariate |       |   |      |         |
|----------------------------|-------------------|-------------------|-----|------------|-------|---|------|---------|--------------|-------|---|------|---------|
|                            |                   | No                | Yes | OR         | 95%CI |   |      | p-Value | OR           | 95%CI |   |      | p-Value |
| Age                        | >24               | 45                | 291 |            | 1.00  |   |      |         |              | -     |   |      |         |
|                            | 18-24             | 58                | 412 | 1.76       | 1.26  | - | 2.46 | <0.001  |              | -     |   |      |         |
| Gender                     | Men               | 80                | 203 |            | 1.00  |   |      |         |              | 1.00  |   |      |         |
|                            | Women             | 99                | 419 | 1.67       | 1.19  | - | 2.34 | <0.001  | 1.48         | 1.04  | - | 2.11 | 0.03    |
| Living area                | Rural             | 17                | 17  |            | 1.00  |   |      |         |              | 1.00  |   |      |         |
|                            | Urban             | 158               | 598 | 3.78       | 1.89  | - | 7.58 | <0.001  | 3.40         | 1.65  | - | 6.99 | 0.001   |
| Scientific background      | No                | 133               | 298 |            | 1.00  |   |      |         |              | 1.00  |   |      |         |
|                            | Yes               | 46                | 329 | 3.19       | 2.20  | - | 4.62 | <0.001  | 2.94         | 2.01  | - | 4.30 | <0.001  |
| Autonomous Community       | Other communities | 59                | 195 |            | 1.00  |   |      |         |              | -     |   |      |         |
|                            | Madrid            | 114               | 413 | 1.10       | 0.77  | - | 1.57 | 0.610   |              | -     |   |      |         |
| Education level university | No                | 67                | 150 |            | 1.00  |   |      |         |              | -     |   |      |         |
|                            | Yes               | 112               | 477 | 1.90       | 1.34  | - | 2.71 | <0.001  |              | -     |   |      |         |
| Media incident             |                   |                   |     |            |       |   |      |         |              |       |   |      |         |

|        |     |     |      |      |   |      |       |   |
|--------|-----|-----|------|------|---|------|-------|---|
| Before | 151 | 501 |      |      |   | 1.00 |       | - |
| After  | 28  | 126 | 1.36 | 0.87 | - | 2.12 | 0.180 | - |

Question 17. Do you think these alternative methods should be used more than animal models?

| Variable                   |                   | Participation (n) |     | Univariate |       |   |         | Multivariate |       |      |         |      |        |
|----------------------------|-------------------|-------------------|-----|------------|-------|---|---------|--------------|-------|------|---------|------|--------|
|                            |                   | No                | Yes | OR         | 95%CI |   | p-Value | OR           | 95%CI |      | p-Value |      |        |
| Age                        |                   |                   |     |            |       |   |         |              |       |      |         |      |        |
|                            | >24               | 92                | 244 |            | 1.00  |   |         |              |       | -    |         |      |        |
|                            | 18-24             | 118               | 352 | 1.12       | 0.82  | - | 1.55    | 0.470        |       | -    |         |      |        |
| Gender                     |                   |                   |     |            |       |   |         |              |       |      |         |      |        |
|                            | Men               | 94                | 189 |            | 1.00  |   |         |              |       | 1.00 |         |      |        |
|                            | Women             | 116               | 402 | 1.72       | 1.25  | - | 2.38    | <0.001       | 1.79  | 1.29 | -       | 2.48 | <0.001 |
| Living area                |                   |                   |     |            |       |   |         |              |       |      |         |      |        |
|                            | Rural             | 10                | 24  |            | 1.00  |   |         |              |       | -    |         |      |        |
|                            | Urban             | 198               | 558 | 1.17       | 0.55  | - | 2.50    | 0.677        |       | -    |         |      |        |
| Scientific background      |                   |                   |     |            |       |   |         |              |       |      |         |      |        |
|                            | Yes               | 108               | 267 |            | 1.00  |   |         |              |       | 1.00 |         |      |        |
|                            | No                | 102               | 329 | 1.30       | 1.79  | - | 0.95    | 0.098        | 1.40  | 1.02 | -       | 1.93 | 0.04   |
| Autonomous Community       |                   |                   |     |            |       |   |         |              |       |      |         |      |        |
|                            | Other communities | 69                | 185 |            | 1.00  |   |         |              |       | -    |         |      |        |
|                            | Madrid            | 135               | 392 | 1.08       | 0.77  | - | 1.52    | 0.640        |       | -    |         |      |        |
| Education level university |                   |                   |     |            |       |   |         |              |       |      |         |      |        |
|                            | Yes               | 163               | 426 |            | 1.00  |   |         |              |       | -    |         |      |        |
|                            | No                | 47                | 170 | 1.38       | 0.96  | - | 2.00    | 0.085        |       | -    |         |      |        |
| Media incident             |                   |                   |     |            |       |   |         |              |       |      |         |      |        |
|                            | Before            | 177               | 475 |            | 1.00  |   |         |              |       | -    |         |      |        |
|                            | After             | 33                | 121 | 1.37       | 0.90  | - | 2.08    | 0.150        |       | -    |         |      |        |

Question 18. Do you think it should be mandatory for all products to state whether animal testing was necessary for their preparation?

| Variable |       | Participation (n) |     | Univariate |       |   |      |         | Multivariate |       |   |         |        |
|----------|-------|-------------------|-----|------------|-------|---|------|---------|--------------|-------|---|---------|--------|
|          |       | No                | Yes | OR         | 95%CI |   |      | p-Value | OR           | 95%CI |   | p-Value |        |
| Age      |       |                   |     |            |       |   |      |         |              |       |   |         |        |
|          | >24   | 45                | 291 |            | 1.00  |   |      |         |              | -     |   |         |        |
|          | 18-24 | 58                | 412 | 1.10       | 0.72  | - | 1.67 | 0.659   |              | -     |   |         |        |
| Gender   |       |                   |     |            |       |   |      |         |              |       |   |         |        |
|          | Men   | 58                | 225 |            | 1.00  |   |      |         |              | 1.00  |   |         |        |
|          | Women | 45                | 473 | 2.71       | 1.78  | - | 4.13 | <0.001  | 2.71         | 1.78  | - | 4.13    | <0.001 |

|                                   |                   |    |     |      |      |   |       |       |   |
|-----------------------------------|-------------------|----|-----|------|------|---|-------|-------|---|
| <b>Living area</b>                |                   |    |     |      |      |   |       |       |   |
|                                   | Rural             | 6  | 28  |      |      |   | 1.00  |       | - |
|                                   | Urban             | 97 | 659 | 1.46 | 0.59 | - | 3.61  | 0.417 | - |
| <b>Scientific background</b>      |                   |    |     |      |      |   |       |       |   |
|                                   | No                | 62 | 369 |      |      |   | 1.00  |       | - |
|                                   | Yes               | 41 | 334 | 1.37 | 0.90 | - | 2.09  | 0.140 | - |
| <b>Autonomous Community</b>       |                   |    |     |      |      |   |       |       |   |
|                                   | Other communities | 35 | 219 |      |      |   | 1.000 |       | - |
|                                   | Madrid            | 66 | 461 | 1.12 | 0.72 | - | 1.73  | 0.620 | - |
| <b>Education level university</b> |                   |    |     |      |      |   |       |       |   |
|                                   | No                | 30 | 187 |      |      |   | 1.00  |       | - |
|                                   | Yes               | 73 | 516 | 1.13 | 0.72 | - | 1.79  | 0.590 | - |
| <b>Media incident</b>             |                   |    |     |      |      |   |       |       |   |
|                                   | Before            | 89 | 563 |      |      |   | 1.00  |       | - |
|                                   | After             | 14 | 140 | 1.58 | 0.87 | - | 2.86  | 0.130 | - |

**Question 18a. If you answered yes, would you stop using a product that previously did not provide that information but now states it was tested in animals?**

| Variable                   |                   | Participation (n) |     | Univariate |       |   |      |         | Multivariate |       |      |         |        |
|----------------------------|-------------------|-------------------|-----|------------|-------|---|------|---------|--------------|-------|------|---------|--------|
|                            |                   | No                | Yes | OR         | 95%CI |   |      | p-Value | OR           | 95%CI |      | p-Value |        |
| Age                        |                   |                   |     |            |       |   |      |         |              |       |      |         |        |
|                            | >24               | 185               | 151 |            | 1.00  |   |      |         |              |       | -    |         |        |
|                            | 18-24             | 214               | 256 | 1.47       | 1.11  | - | 1.94 | 0.010   |              |       | -    |         |        |
| Gender                     |                   |                   |     |            |       |   |      |         |              |       |      |         |        |
|                            | Men               | 173               | 110 |            | 1.00  |   |      |         |              |       | 1.00 |         |        |
|                            | Women             | 224               | 294 | 2.06       | 1.54  | - | 2.77 | <0.001  | 2.08         | 1.54  | -    | 2.81    | <0.001 |
| Living area                |                   |                   |     |            |       |   |      |         |              |       |      |         |        |
|                            | Rural             | 20                | 14  |            | 1.00  |   |      |         |              |       | -    |         |        |
|                            | Urban             | 370               | 386 | 1.49       | 0.74  | - | 2.99 | 0.262   |              |       | -    |         |        |
| Scientific background      |                   |                   |     |            |       |   |      |         |              |       |      |         |        |
|                            | Yes               | 198               | 177 |            | 1.00  |   |      |         |              |       | 1.00 |         |        |
|                            | No                | 201               | 230 | 1.28       | 0.97  | - | 1.69 | 0.081   | 1.41         | 1.06  | -    | 1.89    | 0.018  |
| Autonomous Community       |                   |                   |     |            |       |   |      |         |              |       |      |         |        |
|                            | Other communities | 126               | 128 |            | 1.00  |   |      |         |              |       | -    |         |        |
|                            | Madrid            | 256               | 271 | 1.04       | 0.77  | - | 1.41 | 0.790   |              |       | -    |         |        |
| Education level university |                   |                   |     |            |       |   |      |         |              |       |      |         |        |

|                       |        |     |     |      |      |   |      |        |      |      |      |             |
|-----------------------|--------|-----|-----|------|------|---|------|--------|------|------|------|-------------|
| <b>Media incident</b> | Yes    | 292 | 297 |      |      |   | 1.00 |        |      |      | -    |             |
|                       | No     | 107 | 110 | 1.01 | 0.74 | - | 1.38 | 0.946  |      |      | -    |             |
|                       | Before | 345 | 307 |      |      |   | 1.00 |        |      |      | 1.00 |             |
|                       | After  | 54  | 100 | 2.08 | 1.44 | - | 3.00 | <0.001 | 2.01 | 1.38 | -    | 2.92 <0.001 |

**Question 19. Do you think that animal research has been or is still necessary to find a cure for COVID-19 (e.g., vaccine, treatment)**

| Variable                          |                   | Participation (n) |     | Univariate |       |         |      | Multivariate |       |         |               |
|-----------------------------------|-------------------|-------------------|-----|------------|-------|---------|------|--------------|-------|---------|---------------|
|                                   |                   | No                | Yes | OR         | 95%CI | p-Value |      | OR           | 95%CI | p-Value |               |
| <b>Age</b>                        |                   |                   |     |            |       |         |      |              |       |         |               |
|                                   | 18-24             | 90                | 380 |            |       | 1.00    |      |              |       | -       |               |
|                                   | >24               | 53                | 283 | 1.26       | 0.87  | -       | 1.84 | 0.220        |       | -       |               |
| <b>Gender</b>                     |                   |                   |     |            |       |         |      |              |       |         |               |
|                                   | Women             | 110               | 408 |            |       | 1.00    |      |              |       | 1.00    |               |
|                                   | Men               | 32                | 251 | 2.11       | 1.38  | -       | 3.23 | 0.001        | 2.21  | 1.44    | - 3.41 <0.001 |
| <b>Living area</b>                |                   |                   |     |            |       |         |      |              |       |         |               |
|                                   | Urban             | 135               | 621 |            |       | 1.00    |      |              |       | -       |               |
|                                   | Rural             | 6                 | 28  | 1.01       | 0.41  | -       | 2.50 | 0.980        |       | -       |               |
| <b>Scientific background</b>      |                   |                   |     |            |       |         |      |              |       |         |               |
|                                   | No                | 94                | 337 |            |       | 1.00    |      |              |       | 1.00    |               |
|                                   | Yes               | 49                | 326 | 1.86       | 1.27  | -       | 2.71 | <0.001       | 2.04  | 1.39    | - 3.00 <0.001 |
| <b>Autonomous Community</b>       |                   |                   |     |            |       |         |      |              |       |         |               |
|                                   | Madrid            | 95                | 432 |            |       | 1.00    |      |              |       | -       |               |
|                                   | Other communities | 45                | 209 | 1.02       | 0.69  | -       | 1.51 | 0.916        |       | -       |               |
| <b>Education level university</b> |                   |                   |     |            |       |         |      |              |       |         |               |
|                                   | No                | 50                | 167 |            |       | 1.00    |      |              |       | -       |               |
|                                   | Yes               | 93                | 496 | 1.60       | 1.09  | -       | 2.35 | 0.020        |       | -       |               |
| <b>Media incident</b>             |                   |                   |     |            |       |         |      |              |       |         |               |
|                                   | After             | 40                | 114 |            |       | 1.00    |      |              |       | 1.00    |               |
|                                   | Before            | 103               | 549 | 1.87       | 1.23  | -       | 2.84 | 0.003        | 1.79  | 1.17    | - 2.76 0.008  |

**Question 20. Do you think that scientists should conduct animal testing only in certain situations such as the SARS-Cov-2 emergency, and not for other diseases?**

| Variable   |       | Participation (n) |     | Univariate |       |         |      | Multivariate |       |         |  |
|------------|-------|-------------------|-----|------------|-------|---------|------|--------------|-------|---------|--|
|            |       | No                | Yes | OR         | 95%CI | p-Value |      | OR           | 95%CI | p-Value |  |
| <b>Age</b> |       |                   |     |            |       |         |      |              |       |         |  |
|            | 18-24 | 335               | 135 |            |       | 1.00    |      |              |       | -       |  |
|            | >24   | 238               | 98  | 1.02       | 0.75  | -       | 1.39 | 0.890        |       | -       |  |

|                                   |                   |     |     |      |      |      |      |        |      |      |      |      |        |
|-----------------------------------|-------------------|-----|-----|------|------|------|------|--------|------|------|------|------|--------|
| <b>Gender</b>                     |                   |     |     |      |      |      |      |        |      |      |      |      |        |
|                                   | Women             | 372 | 146 |      |      | 1.00 |      |        |      |      | -    |      |        |
|                                   | Men               | 196 | 87  | 1.13 | 0.82 | -    | 1.55 | 0.450  |      |      | -    |      |        |
| <b>Living area</b>                |                   |     |     |      |      |      |      |        |      |      |      |      |        |
|                                   | Urban             | 545 | 211 |      |      | 1.00 |      |        |      |      | -    |      |        |
|                                   | Rural             | 18  | 16  | 2.30 | 1.15 | -    | 4.59 | 0.020  |      |      | -    |      |        |
| <b>Scientific background</b>      |                   |     |     |      |      |      |      |        |      |      |      |      |        |
|                                   | Yes               | 311 | 64  |      |      | 1.00 |      |        |      |      | 1.00 |      |        |
|                                   | No                | 262 | 169 | 3.13 | 2.25 | -    | 4.37 | <0.001 | 3.27 | 2.34 | -    | 4.58 | <0.001 |
| <b>Autonomous Community</b>       |                   |     |     |      |      |      |      |        |      |      |      |      |        |
|                                   | Other communities | 181 | 73  |      |      | 1.00 |      |        |      |      | -    |      |        |
|                                   | Madrid            | 372 | 155 | 1.03 | 0.74 | -    | 1.44 | 0.850  |      |      | -    |      |        |
| <b>Education level university</b> |                   |     |     |      |      |      |      |        |      |      |      |      |        |
|                                   | Yes               | 440 | 149 |      |      | 1.00 |      |        |      |      | -    |      |        |
|                                   | No                | 133 | 84  | 1.87 | 1.34 | -    | 2.60 | <0.001 |      |      | -    |      |        |
| <b>Media incident</b>             |                   |     |     |      |      |      |      |        |      |      |      |      |        |
|                                   | Before            | 478 | 174 |      |      | 1.00 |      |        |      |      | 1.00 |      |        |
|                                   | After             | 95  | 59  | 1.71 | 1.18 | -    | 2.47 | <0.001 | 1.92 | 1.31 | -    | 2.83 | 0.001  |

**Question 21. Has this survey made you think about animal research?**

| Variable              |        | Participation (n) |     | Univariate |       |   |      |         | Multivariate |       |   |      |         |  |
|-----------------------|--------|-------------------|-----|------------|-------|---|------|---------|--------------|-------|---|------|---------|--|
|                       |        | No                | Yes | OR         | 95%CI |   |      | p-Value | OR           | 95%CI |   |      | p-Value |  |
| Age                   |        |                   |     |            |       |   |      |         |              |       |   |      |         |  |
|                       | >24    | 68                | 268 |            | 1.00  |   |      |         |              | -     |   |      |         |  |
|                       | 18-24  | 72                | 398 | 1.40       | 0.97  | - | 2.02 | 0.070   |              |       | - |      |         |  |
| Gender                |        |                   |     |            |       |   |      |         |              |       |   |      |         |  |
|                       | Men    | 68                | 215 |            | 1.00  |   |      |         |              | 1.00  |   |      |         |  |
|                       | Women  | 71                | 447 | 1.99       | 1.38  | - | 2.88 | <0.001  | 2.06         | 1.41  | - | 3.02 | <0.001  |  |
| Living area           |        |                   |     |            |       |   |      |         |              |       |   |      |         |  |
|                       | Rural  | 7                 | 27  |            | 1.00  |   |      |         |              | -     |   |      |         |  |
|                       | Urban  | 132               | 624 | 1.23       | 0.52  | - | 2.87 | 0.640   |              |       | - |      |         |  |
| Scientific background |        |                   |     |            |       |   |      |         |              |       |   |      |         |  |
|                       | Yes    | 80                | 295 |            | 1.00  |   |      |         |              | 1.00  |   |      |         |  |
|                       | No     | 60                | 371 | 1.68       | 1.16  | - | 2.42 | 0.006   | 1.89         | 1.29  | - | 2.76 | 0.001   |  |
| Autonomous Community  |        |                   |     |            |       |   |      |         |              |       |   |      |         |  |
|                       | Madrid | 96                | 431 |            | 1.00  |   |      |         |              | -     |   |      |         |  |



|                                           |                      |     |     |      |      |   |      |        |      |      |   |      |       |
|-------------------------------------------|----------------------|-----|-----|------|------|---|------|--------|------|------|---|------|-------|
| <b>Education<br/>level<br/>university</b> | Other<br>communities | 39  | 215 | 1.23 | 0.82 | - | 1.84 | 0.322  |      |      |   |      | -     |
|                                           | Yes                  | 113 | 476 |      |      |   | 1.00 |        |      |      |   |      | -     |
|                                           | No                   | 27  | 190 | 1.67 | 1.06 | - | 2.63 | 0.026  |      |      |   |      | -     |
| <b>Media<br/>incident</b>                 | Before               | 128 | 524 |      |      |   | 1.00 |        |      |      |   | 1.00 |       |
|                                           | After                | 12  | 142 | 2.89 | 1.55 | - | 5.37 | <0.001 | 2.85 | 1.52 | - | 5.33 | 0.001 |

---
